# Supplementary material for: The Development of an Arabic Weight-Loss App Akser Waznk: Qualitative Results
Source: PubMed Central journal article supplement (PMC6437613; doi:10.2196/11785), 2019-03-14
Supplement: formative_v3i1e11785_app1.pdf [file formative_v3i1e11785_app1.pdf]

## Multimedia Appendix 1: Lifestyle self-assessment questions

| Aspect              | Question                                                                                                                                             |
|---------------------|------------------------------------------------------------------------------------------------------------------------------------------------------|
| Vegetables          | Are you eating two or more servings (of 200g each) of vegetables every day?                                                                          |
|                     | Are you eating pasta, vegetable or rice dishes with garlic, tomato, leek or onion two or more times per week?                                        |
| Fruits              | Are you eating three or more servings of fruit (of 80g each) every day?                                                                              |
| Oils                | Do you use olive oil as the main culinary fat?                                                                                                       |
|                     | Do you use four or more tablespoons of olive oil every day?                                                                                          |
|                     | Are you eating less than one serving (12g) of butter, margarine, or cream every day?                                                                 |
| Sugar               | Are you consuming less than one serving (330ml) of sweet or sugar-sweetened carbonated beverages every day?                                          |
|                     | Are you eating less than three servings of commercial sweets/pastries every week?                                                                    |
| Meat and beans      | Are you eating less than one serving (100–150g) of red meat/hamburgers/other meat products every day?                                                |
|                     | Are you consuming three or more servings (of 150g) of legumes every week?                                                                            |
|                     | Are you eating three or more servings of fish (100–150g) or seafood (200g) every week?                                                               |
|                     | Are you consuming less than one serving (30g) of nuts every week?                                                                                    |
|                     | Are you eating chicken, turkey or rabbit routinely instead of veal, hamburger or sausage?                                                            |
| Dairy               | Are you eating two or less servings of dairy products every day? (One serving is one cup of milk or yogurt, three slices of processed cheese slices) |
|                     | Are you consuming low fat or skimmed milk products in place of full fat?                                                                             |
| Bread and cereal    | Did you eat wholegrains in place of refined grains?                                                                                                  |
| Water               | Did you consume the recommended water quantity per day?                                                                                              |
| Physical activities | Did you do any kind of physical activity for 45 minutes five or more times per week or more?                                                         |
